# Supplementary material for: A new fluorescent rhodamine B derivative as an “off–on” chemosensor for Cu2+with high selectivity and sensitivity
Source: Royal Society of Chemistry journal article supplement (doi:10.1039/c5ay02792f), 2015-12-21
Supplement: c5ay02792f2.pdf [file c5ay02792f2.pdf]

## Supporting Information

### A New Fluorescent Rhodamine B Derivative as “Off-On” Chemosensor for Cu(II) with High Selectivity and Sensitivity

Xianfu Meng, Yanxia Xu, Jinliang Liu\*, Lining Sun, and Liyi Shi\*

Research Center of Nano Science and Technology, Shanghai University, 200444, China.

\* Corresponding authors.

E-mail addresses: liujl@shu.edu.cn; shiliyi@shu.edu.cn.

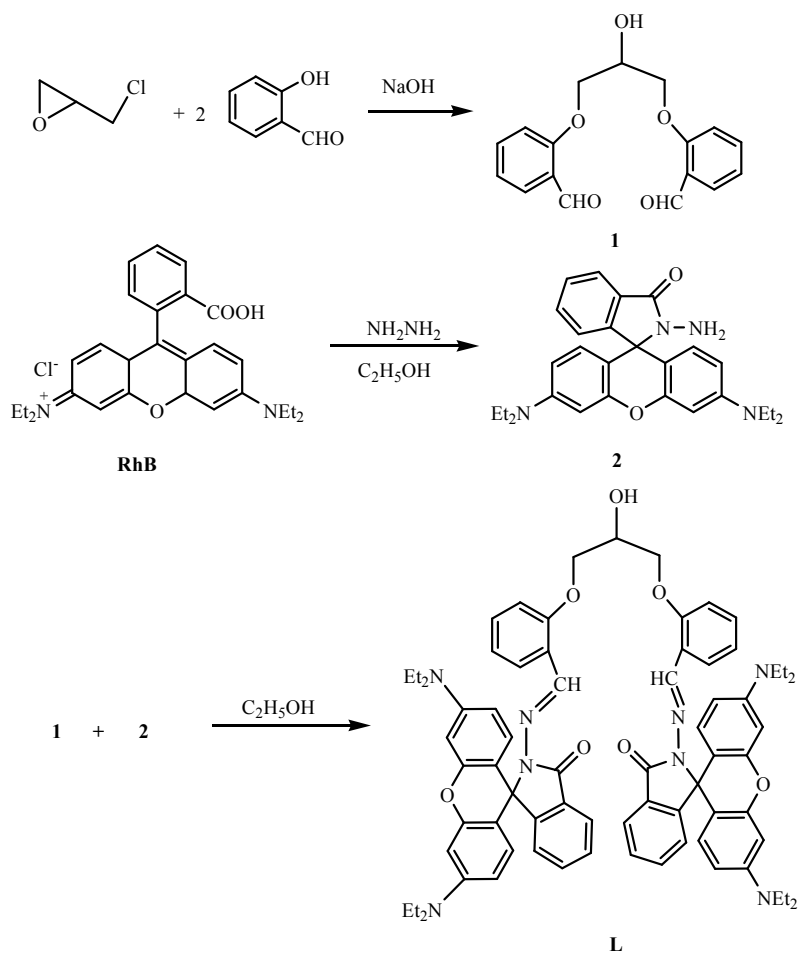

Scheme S1. The synthesis procedure of DFPP (1), RhB-NH<sub>2</sub> (2), and DFPP-RhB (L).

Table 1. Crystal data and structure refinement for DFPP-RhB.

|                                   |                                                                               |                  |
|-----------------------------------|-------------------------------------------------------------------------------|------------------|
| Identification code               | DFPP-RhB                                                                      |                  |
| Empirical formula                 | C <sub>75</sub> H <sub>80</sub> Cl <sub>4</sub> N <sub>8</sub> O <sub>7</sub> |                  |
| Formula weight                    | 1347.27                                                                       |                  |
| Temperature                       | 203(2) K                                                                      |                  |
| Wavelength                        | 0.71073 Å                                                                     |                  |
| Crystal system                    | Triclinic                                                                     |                  |
| Space group                       | P -1                                                                          |                  |
| Unit cell dimensions              | a = 11.852(2) Å                                                               | a = 102.763(3) Å |
|                                   | b = 17.309(3) Å                                                               | b = 90.722(3) Å  |
|                                   | c = 18.485(4) Å                                                               | g = 94.945(3) Å  |
| Volume                            | 3682.9(12) Å <sup>3</sup>                                                     |                  |
| Z                                 | 2                                                                             |                  |
| Density (calculated)              | 1.215 Mg/m <sup>3</sup>                                                       |                  |
| Absorption coefficient            | 0.218 mm <sup>-1</sup>                                                        |                  |
| F(000)                            | 1420                                                                          |                  |
| Crystal size                      | 0.700 x 0.700 x 0.650 mm <sup>3</sup>                                         |                  |
| Theta range for data collection   | 1.461 to 25.150 Å                                                             |                  |
| Index ranges                      | -14 ≤ h ≤ 14, -20 ≤ k ≤ 19, -15 ≤ l ≤ 22                                      |                  |
| Reflections collected             | 21641                                                                         |                  |
| Independent reflections           | 13018 [R(int) = 0.0348]                                                       |                  |
| Completeness to theta = 25.242?   | 97.7 %                                                                        |                  |
| Absorption correction             | Semi-empirical from equivalents                                               |                  |
| Max. and min. transmission        | 0.745 and 0.620                                                               |                  |
| Refinement method                 | Full-matrix least-squares on F <sup>2</sup>                                   |                  |
| Data / restraints / parameters    | 13018 / 36 / 894                                                              |                  |
| Goodness-of-fit on F <sup>2</sup> | 1.233                                                                         |                  |
| Final R indices [I > 2σ(I)]       | R1 = 0.1058, wR2 = 0.3019                                                     |                  |
| R indices (all data)              | R1 = 0.1383, wR2 = 0.3355                                                     |                  |
| Extinction coefficient            | n/a                                                                           |                  |
| Largest diff. peak and hole       | 1.504 and -1.208 e.Å <sup>-3</sup>                                            |                  |

Table 2. Bond lengths (Å) and angles (deg) for DFPP-RhB

| Bond lengths (Å) and angles (deg) for DFPP-RhB |           |               |           |             |          |
|------------------------------------------------|-----------|---------------|-----------|-------------|----------|
| N(1)-C(10)                                     | 1.379(5)  | C(74)-Cl(1)   | 1.678(8)  | C(32)-C(33) | 1.485(9) |
| N(1)-N(2)                                      | 1.382(4)  | C(74)-Cl(2)   | 1.750(8)  | C(34)-C(35) | 1.527(6) |
| N(1)-C(17)                                     | 1.511(5)  | C(68)-C(69)   | 1.503(14) | C(36)-C(37) | 1.499(6) |
| N(2)-C(9)                                      | 1.283(5)  | C(68')-C(69') | 1.496(16) | C(39)-C(40) | 1.378(5) |
| N(3)-C(21)                                     | 1.378(5)  | C(3)-C(4)     | 1.397(6)  | C(39)-C(44) | 1.395(5) |
| N(3)-C(30)                                     | 1.436(7)  | C(3)-C(8)     | 1.399(5)  | C(40)-C(41) | 1.398(7) |
| N(3)-C(32)                                     | 1.453(7)  | C(4)-C(5)     | 1.370(7)  | C(41)-C(42) | 1.379(7) |
| N(4)-C(26)                                     | 1.365(5)  | C(5)-C(6)     | 1.383(7)  | C(42)-C(43) | 1.367(6) |
| N(4)-C(34)                                     | 1.462(5)  | C(6)-C(7)     | 1.380(6)  | C(43)-C(44) | 1.400(6) |
| N(4)-C(36)                                     | 1.473(5)  | C(7)-C(8)     | 1.395(6)  | C(44)-C(45) | 1.470(5) |
| N(5)-N(6)                                      | 1.380(4)  | C(8)-C(9)     | 1.469(5)  | C(46)-C(47) | 1.479(6) |
| N(5)-C(46)                                     | 1.391(5)  | C(10)-C(11)   | 1.468(6)  | C(47)-C(52) | 1.374(5) |
| N(5)-C(53)                                     | 1.488(5)  | C(11)-C(12)   | 1.385(6)  | C(47)-C(48) | 1.379(6) |
| N(6)-C(45)                                     | 1.274(5)  | C(11)-C(16)   | 1.391(6)  | C(48)-C(49) | 1.380(7) |
| N(7)-C(57)                                     | 1.392(7)  | C(12)-C(13)   | 1.400(7)  | C(49)-C(50) | 1.395(7) |
| N(7)-C(66)                                     | 1.440(7)  | C(13)-C(14)   | 1.374(7)  | C(50)-C(51) | 1.375(6) |
| N(7)-C(68')                                    | 1.495(18) | C(14)-C(15)   | 1.380(6)  | C(51)-C(52) | 1.393(6) |
| N(7)-C(68)                                     | 1.546(12) | C(15)-C(16)   | 1.386(6)  | C(52)-C(53) | 1.519(5) |
| N(8)-C(62)                                     | 1.373(5)  | C(16)-C(17)   | 1.513(5)  | C(53)-C(65) | 1.503(5) |
| N(8)-C(70)                                     | 1.440(6)  | C(17)-C(29)   | 1.508(5)  | C(53)-C(54) | 1.514(5) |
| N(8)-C(72)                                     | 1.463(6)  | C(17)-C(18)   | 1.516(5)  | C(54)-C(59) | 1.389(5) |
| O(2)-C(3)                                      | 1.360(5)  | C(18)-C(23)   | 1.378(5)  | C(54)-C(55) | 1.394(6) |
| O(2)-C(2)                                      | 1.442(5)  | C(18)-C(19)   | 1.396(5)  | C(55)-C(56) | 1.365(7) |
| O(3)-C(10)                                     | 1.226(5)  | C(19)-C(20)   | 1.379(6)  | C(56)-C(57) | 1.414(7) |
| O(4)-C(23)                                     | 1.377(4)  | C(20)-C(21)   | 1.407(6)  | C(57)-C(58) | 1.392(6) |
| O(4)-C(24)                                     | 1.394(4)  | C(21)-C(22)   | 1.405(6)  | C(58)-C(59) | 1.377(6) |
| O(5)-C(39)                                     | 1.368(5)  | C(22)-C(23)   | 1.391(5)  | C(60)-C(65) | 1.383(5) |
| O(5)-C(38)                                     | 1.427(5)  | C(24)-C(29)   | 1.371(5)  | C(60)-C(61) | 1.391(5) |
| O(6)-C(46)                                     | 1.217(5)  | C(24)-C(25)   | 1.390(5)  | C(61)-C(62) | 1.396(6) |
| O(7)-C(59)                                     | 1.380(4)  | C(25)-C(26)   | 1.399(5)  | C(62)-C(63) | 1.410(6) |
| O(7)-C(60)                                     | 1.387(5)  | C(26)-C(27)   | 1.425(5)  | C(63)-C(64) | 1.389(6) |
| C(1)-O(1)                                      | 1.409(6)  | C(27)-C(28)   | 1.354(6)  | C(64)-C(65) | 1.388(5) |
| C(1)-C(38)                                     | 1.481(7)  | C(28)-C(29)   | 1.406(5)  | C(66)-C(67) | 1.461(8) |
| C(1)-C(2)                                      | 1.494(7)  | C(30)-C(31)   | 1.586(10) | C(70)-C(71) | 1.520(7) |
| C(72)-C(73)                                    | 1.515(8)  | C(75)-Cl(4)   | 1.701(9)  | C(75)-Cl(3) | 1.708(9) |

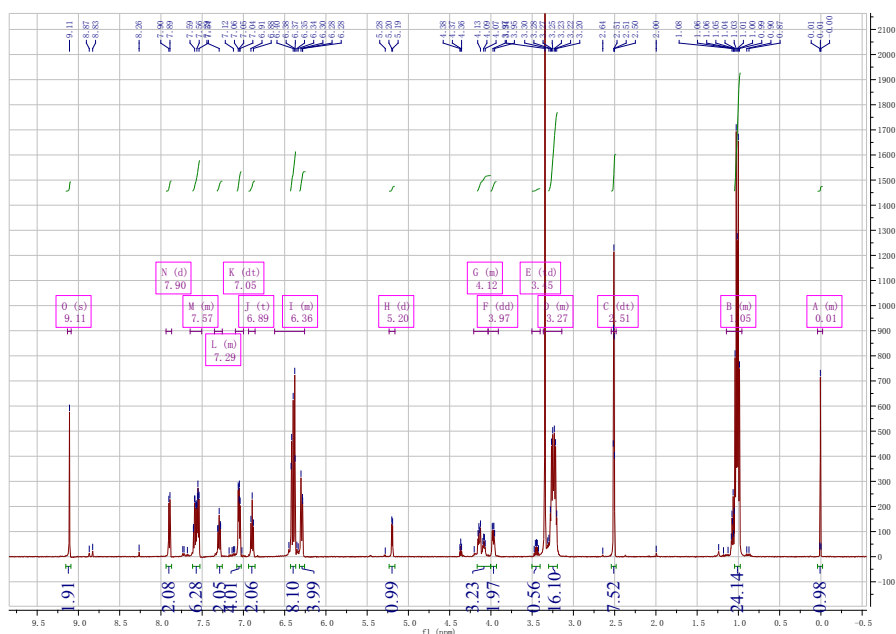

Figure S1.  $^1\text{H}$  NMR spectra of DFPP-RhB (DMSO- $d_6$ ).

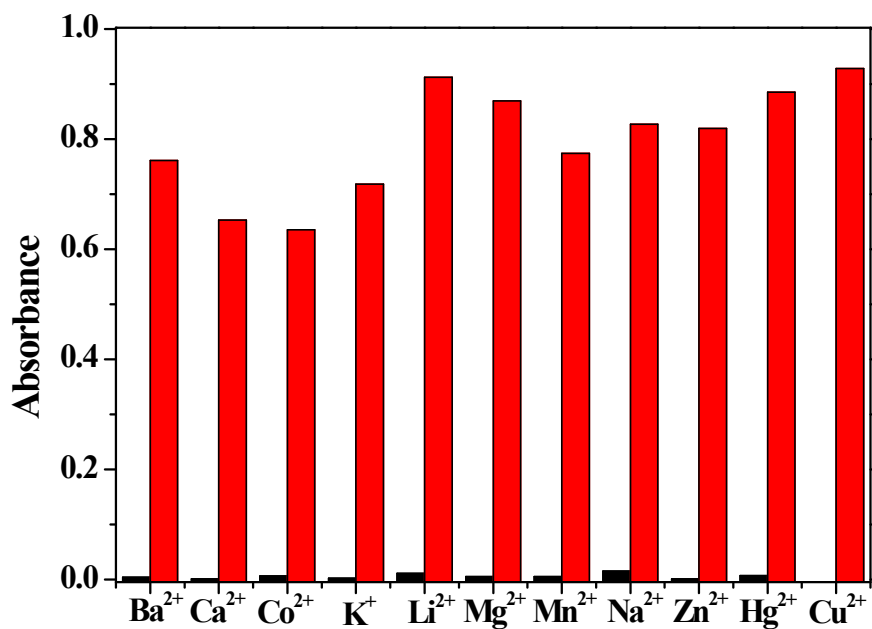

Figure S2. Absorbance changes at 552 nm of DFPP-RhB (10  $\mu\text{M}$ ) towards different metal ions (20  $\mu\text{M}$ ) in ethanol solution. Dark bars represent the response of DFPP-RhB towards the metal ions of interest, red bars represent the subsequent addition of  $\text{Cu}^{2+}$  (10  $\mu\text{M}$ ) to the above solution.

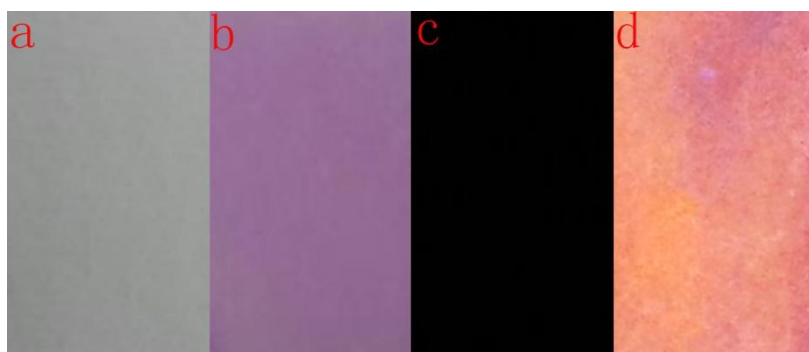

Figure S3. The test paper of DFPP-RhB (a) and after the addition of  $\text{Cu}^{2+}$  (b) in the bright field; The test paper of DFPP-RhB (c) and after the addition of  $\text{Cu}^{2+}$  (d) under excitation with UV light at 365 nm.

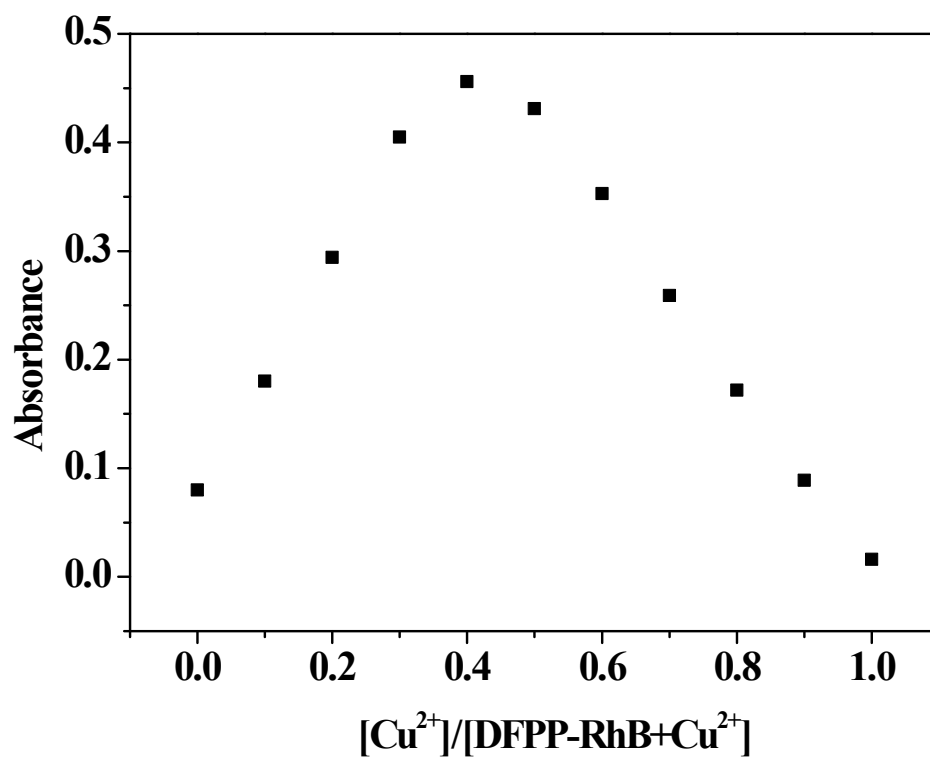

Figure S4. The Job's Plot curve of DFPP-RhB and  $\text{Cu}^{2+}$ . The total concentration of DFPP-RhB and  $\text{Cu}^{2+}$  was kept constantly at  $10\mu\text{M}$ .

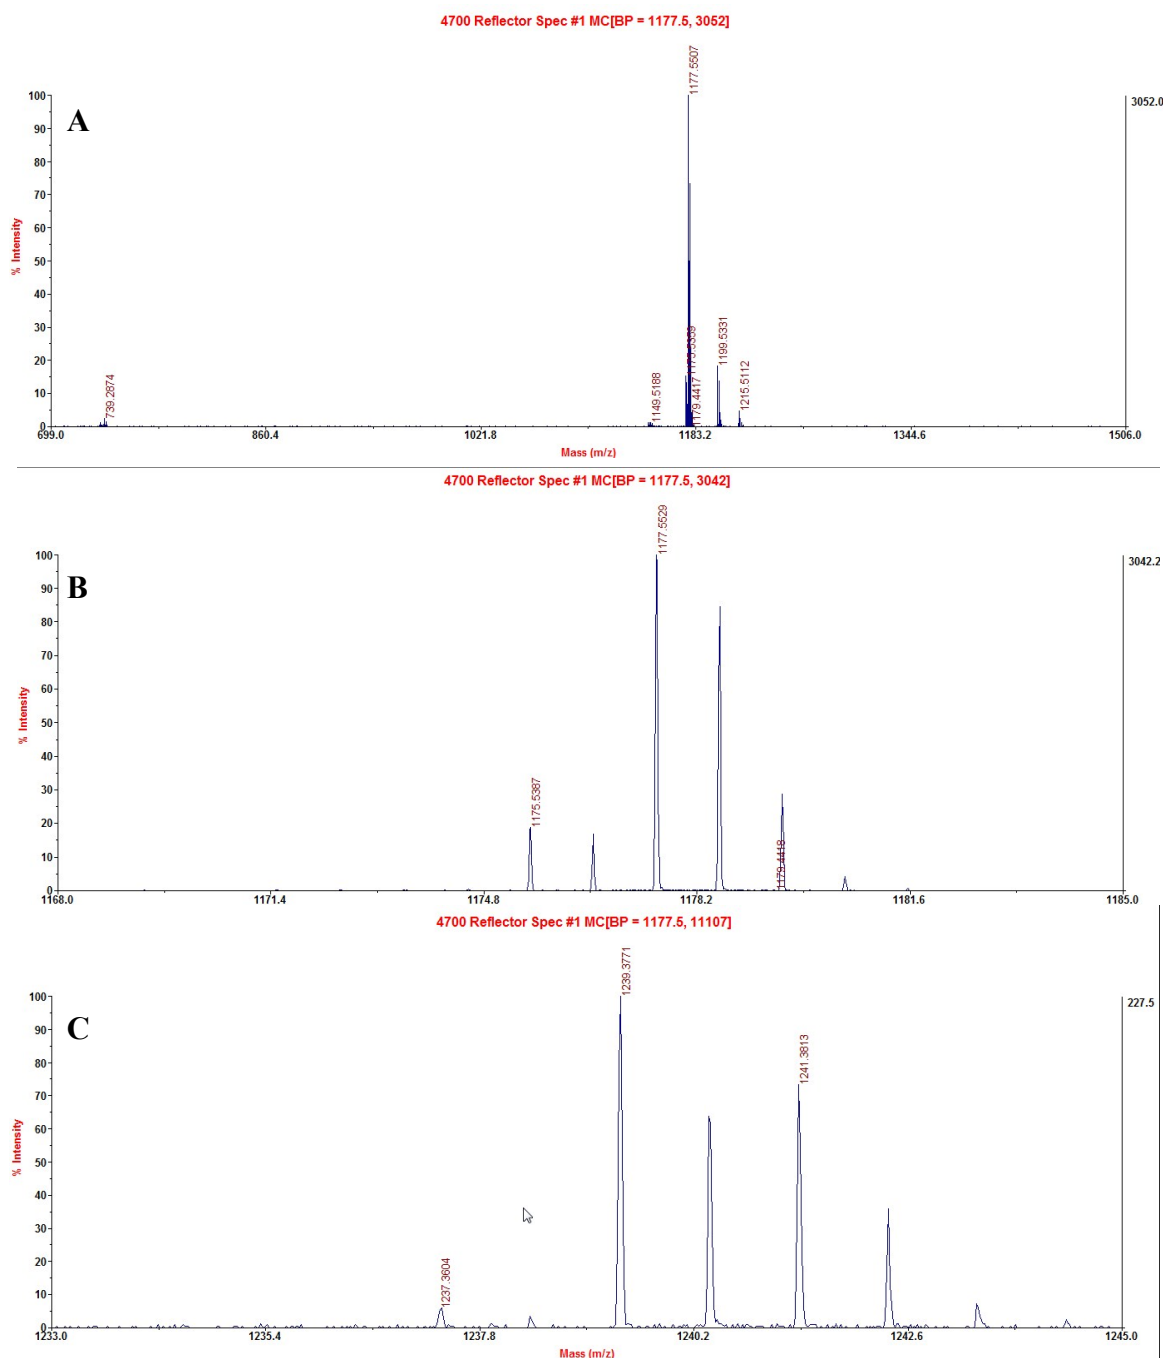

Figure S5. The ESI mass spectra of DFPP-RhB (10  $\mu$ M) in the absence (A and B) and presence (C) of  $\text{Cu}^{2+}$  (20 equiv).

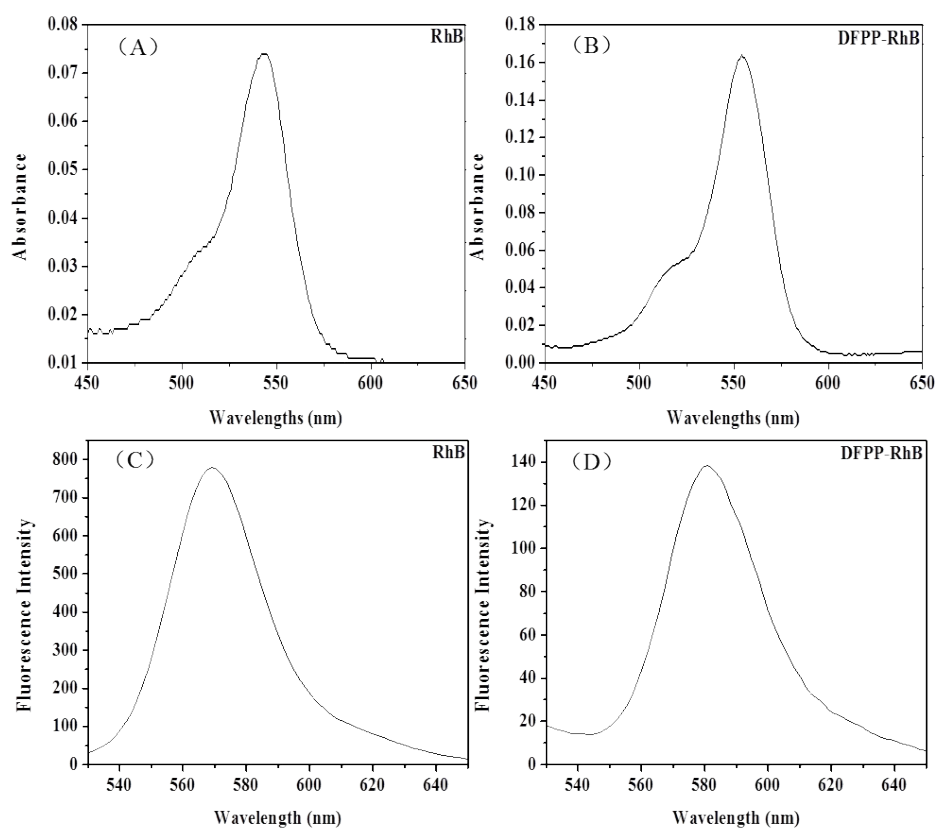

Figure S6. The absorbance spectra of RhB (A) and DFPP-RhB (B), and the fluorescence spectra of RhB (C) and DFPP-RhB (D). The concentration of RhB or DFPP-RhB is  $10^{-6}$  M in absolute ethyl alcohol solution. The fluorescence quantum yield of DFPP-RhB relative to rhodamine B (RhB) was calculated according to the following equation:

$$Q=Q_R \times (I/I_R) \times (A_R/A) \times (\eta^2/\eta_R^2)$$

where  $Q_R$  is the quantum yield of the standard (here is RhB),  $A$  and  $A_R$  are the absorbance of the DFPP-RhB and RhB solution respectively,  $I$  and  $I_R$  are the emission intensity integration of the DFPP-RhB and RhB solution respectively, and  $\eta$  and  $\eta_R$  are the average refractive index of the solution. Because the both solvents of solution are absolute ethyl alcohol, so the equation is simplified to that:

$$Q=Q_R \times (I/I_R) \times (A_R/A)$$

According to the absorption and emission spectra of RhB and DFPP-RhB, the quantum yield of DFPP-RhB is calculated to be 7.87%.

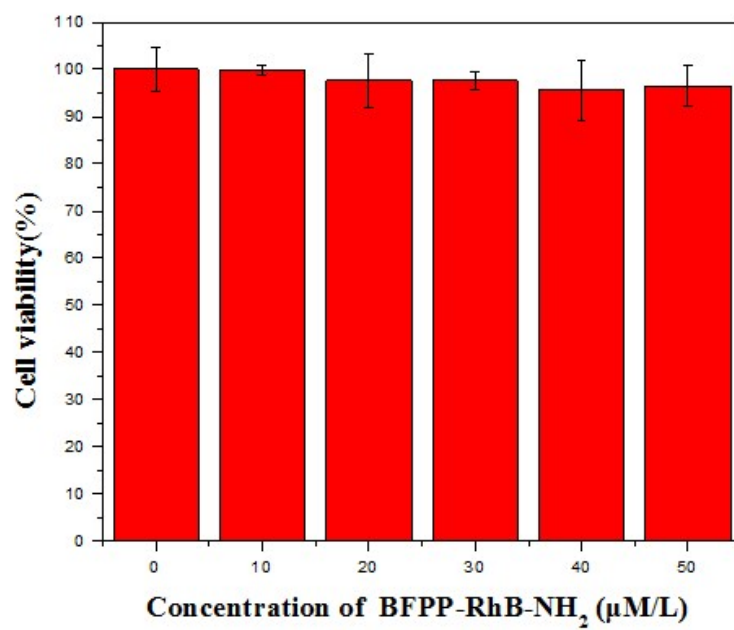

Figure S7. The *in vitro* viability of HeLa cells incubated with DFPP-RhB of different concentrations for 24 h at 37 °C.
